# Supplementary material
Source: PubMed Central journal article supplement (PMC3029252)

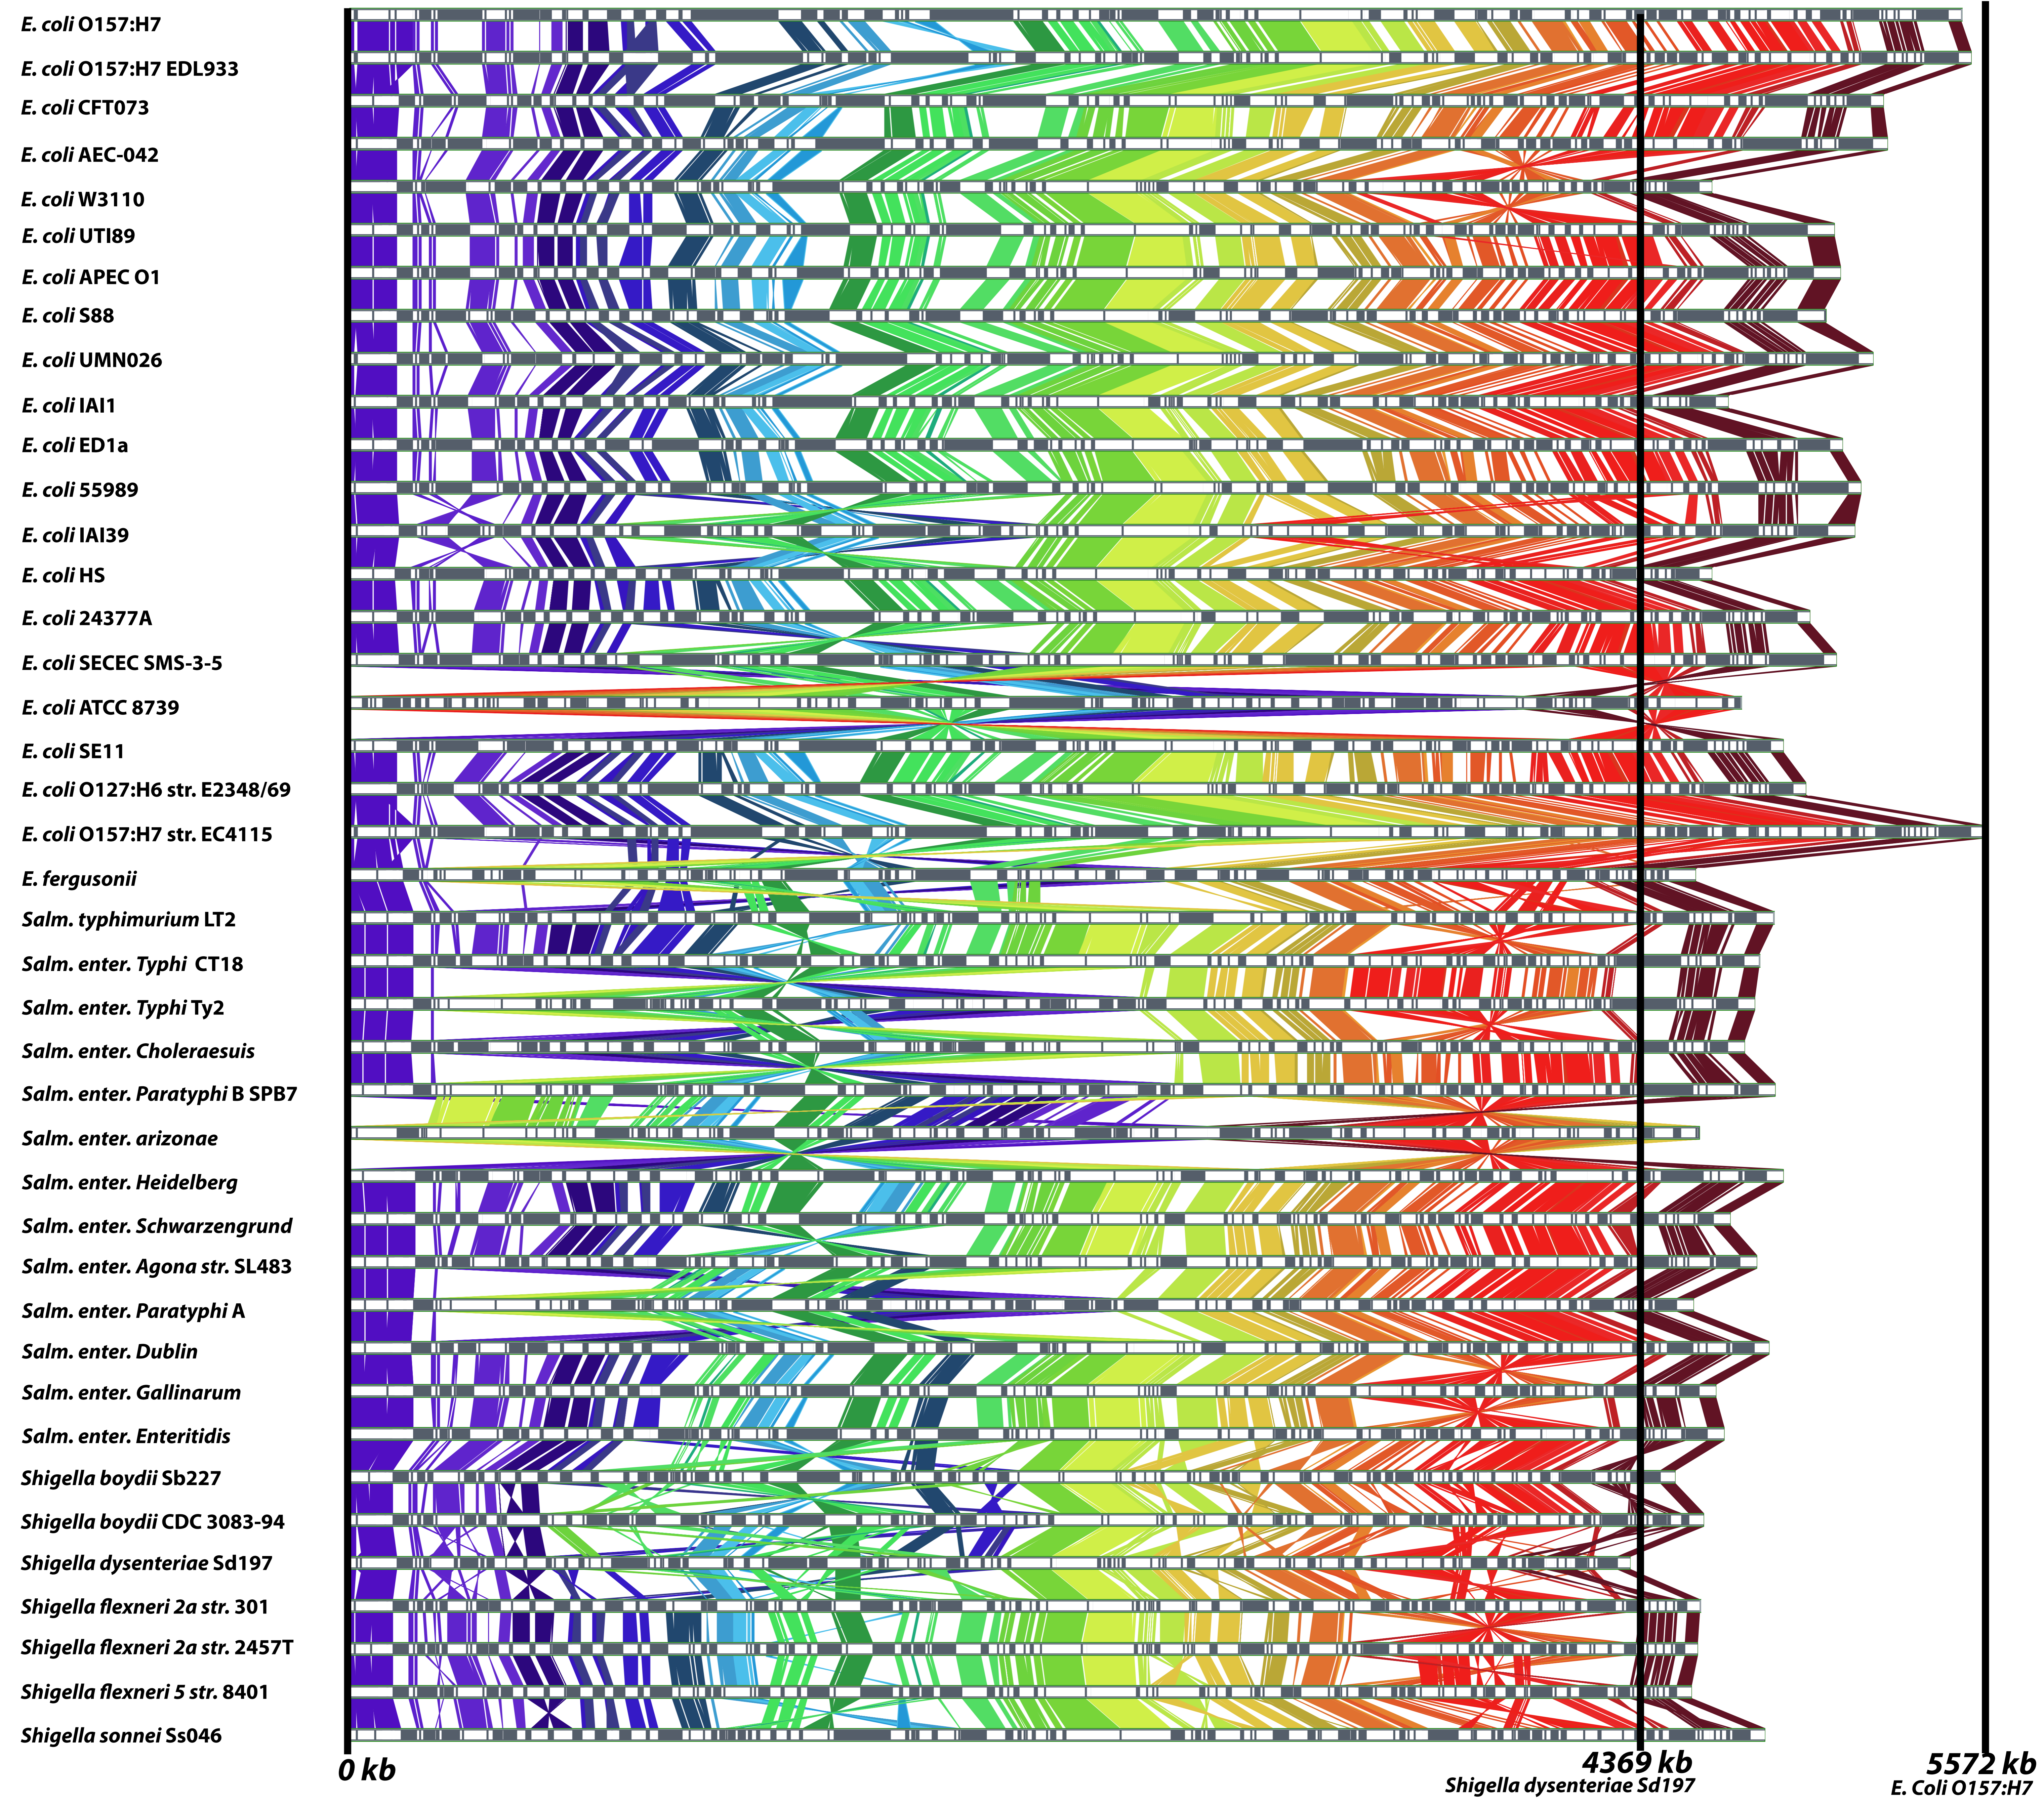

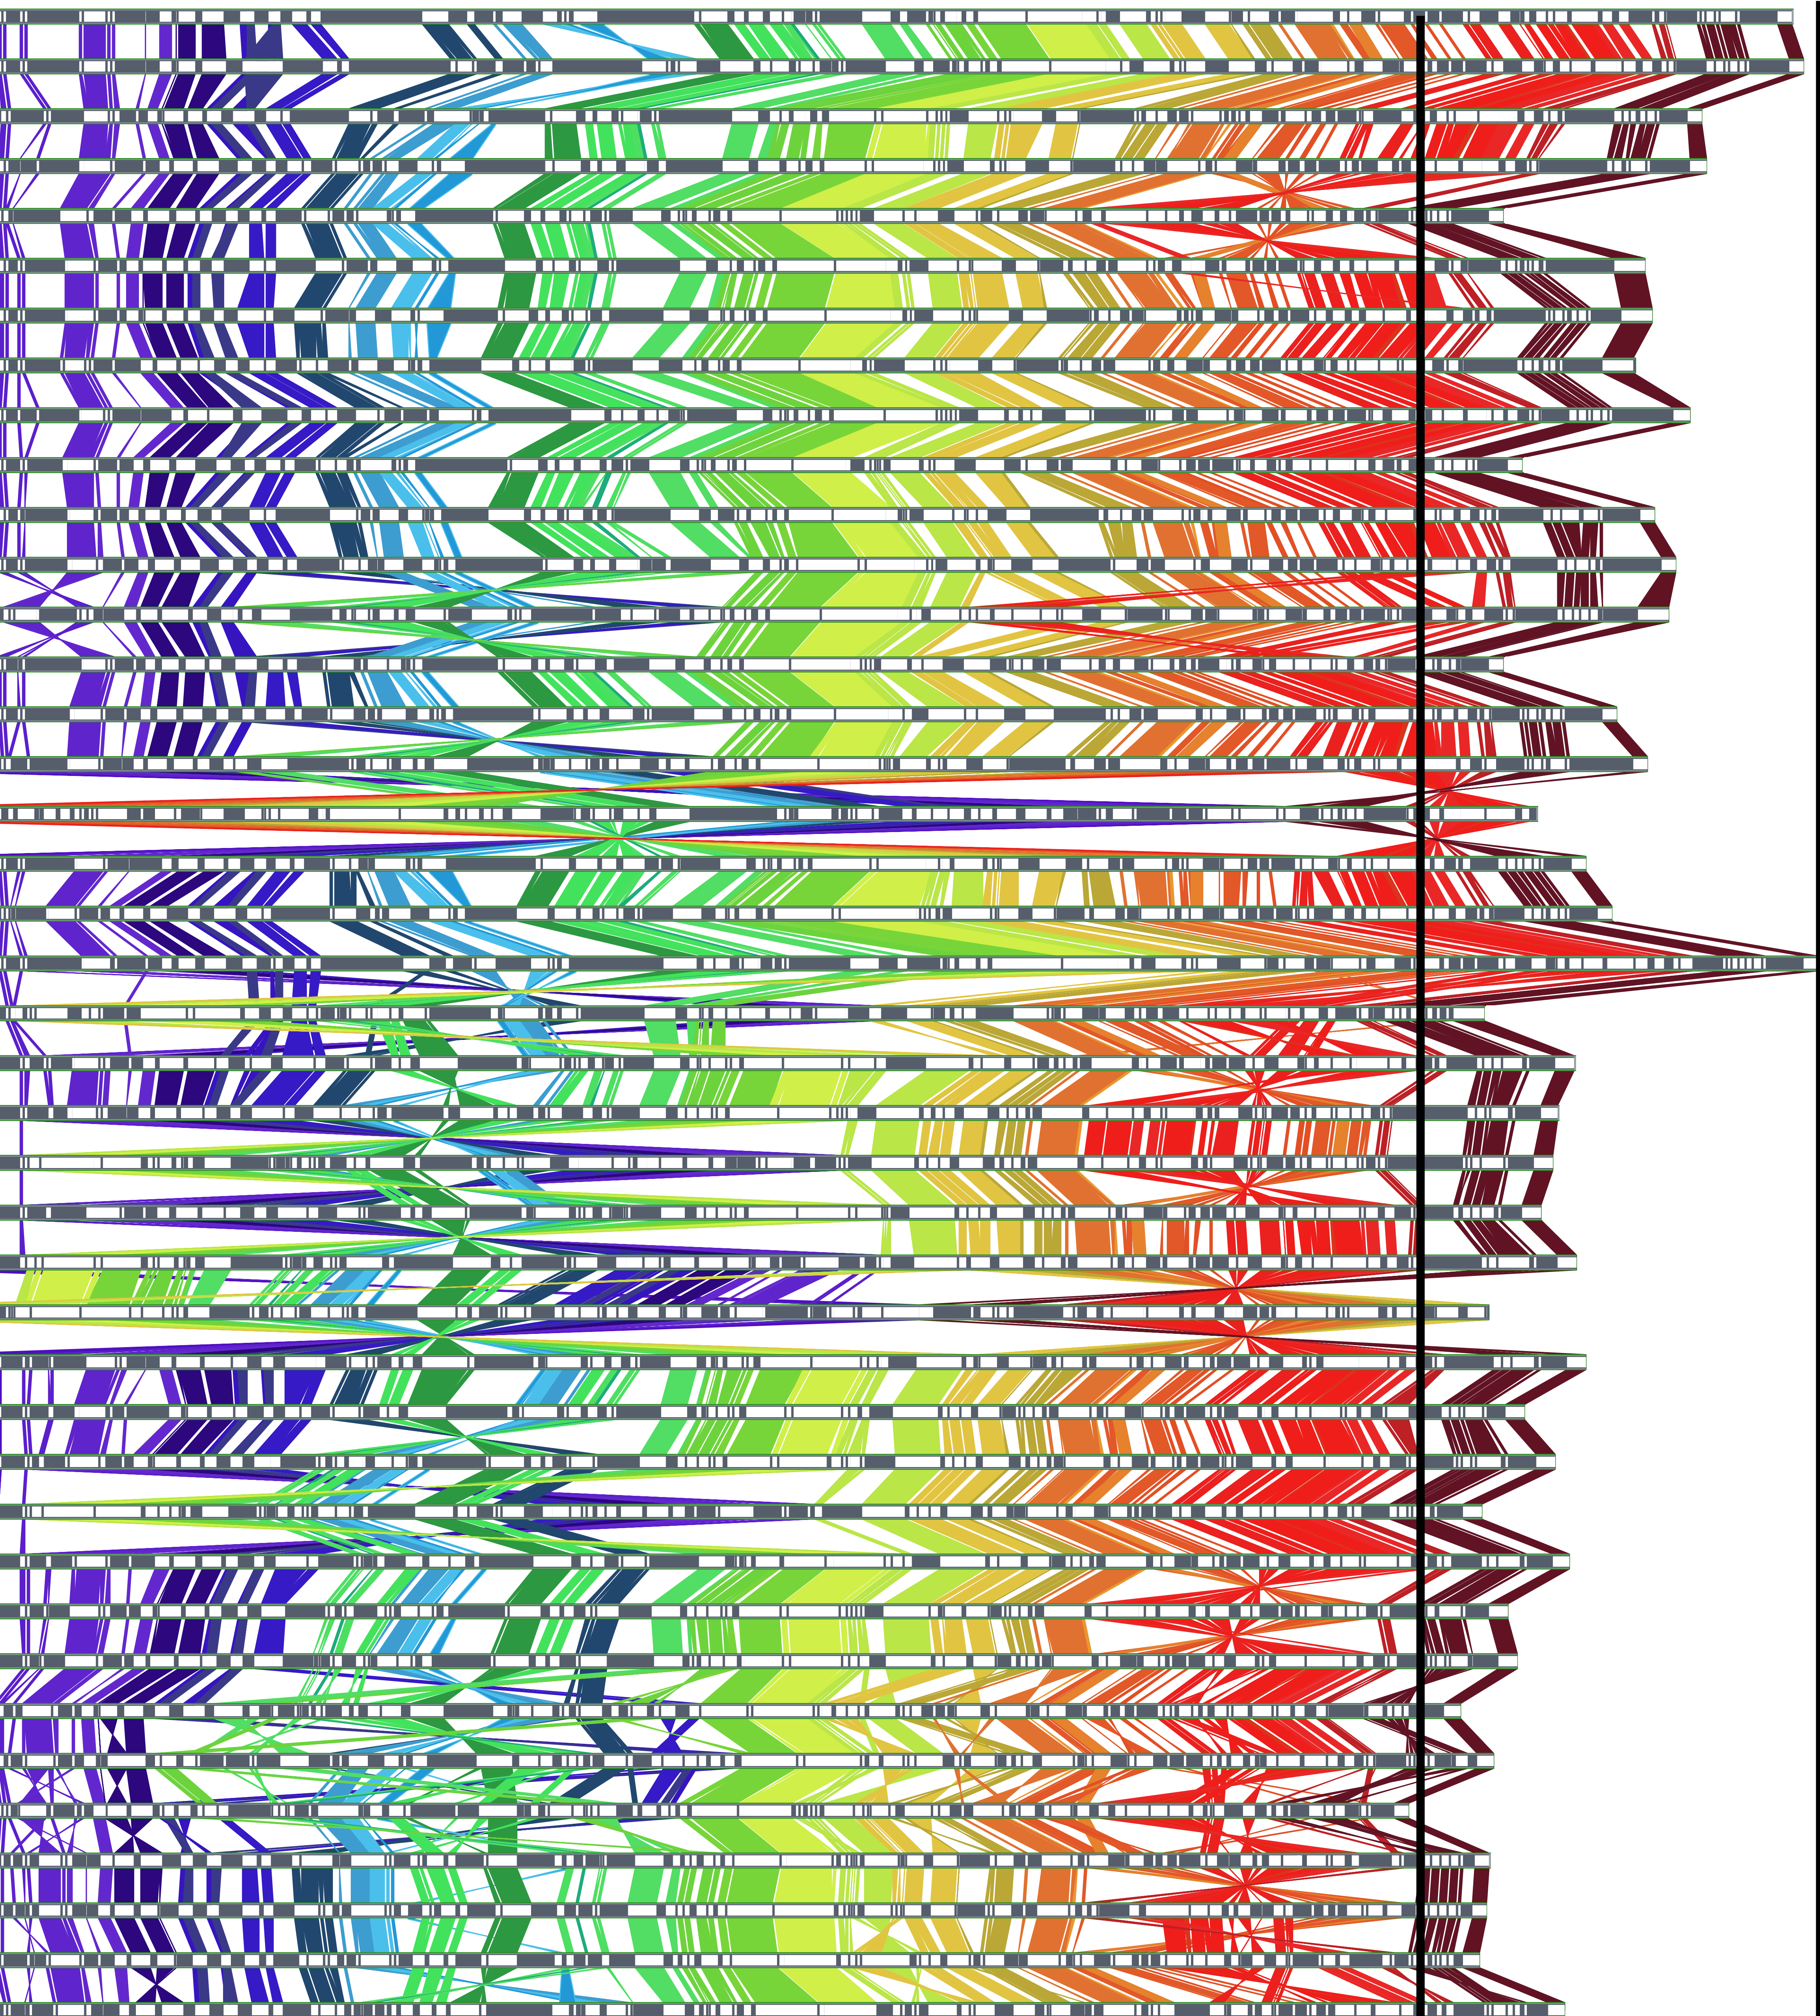

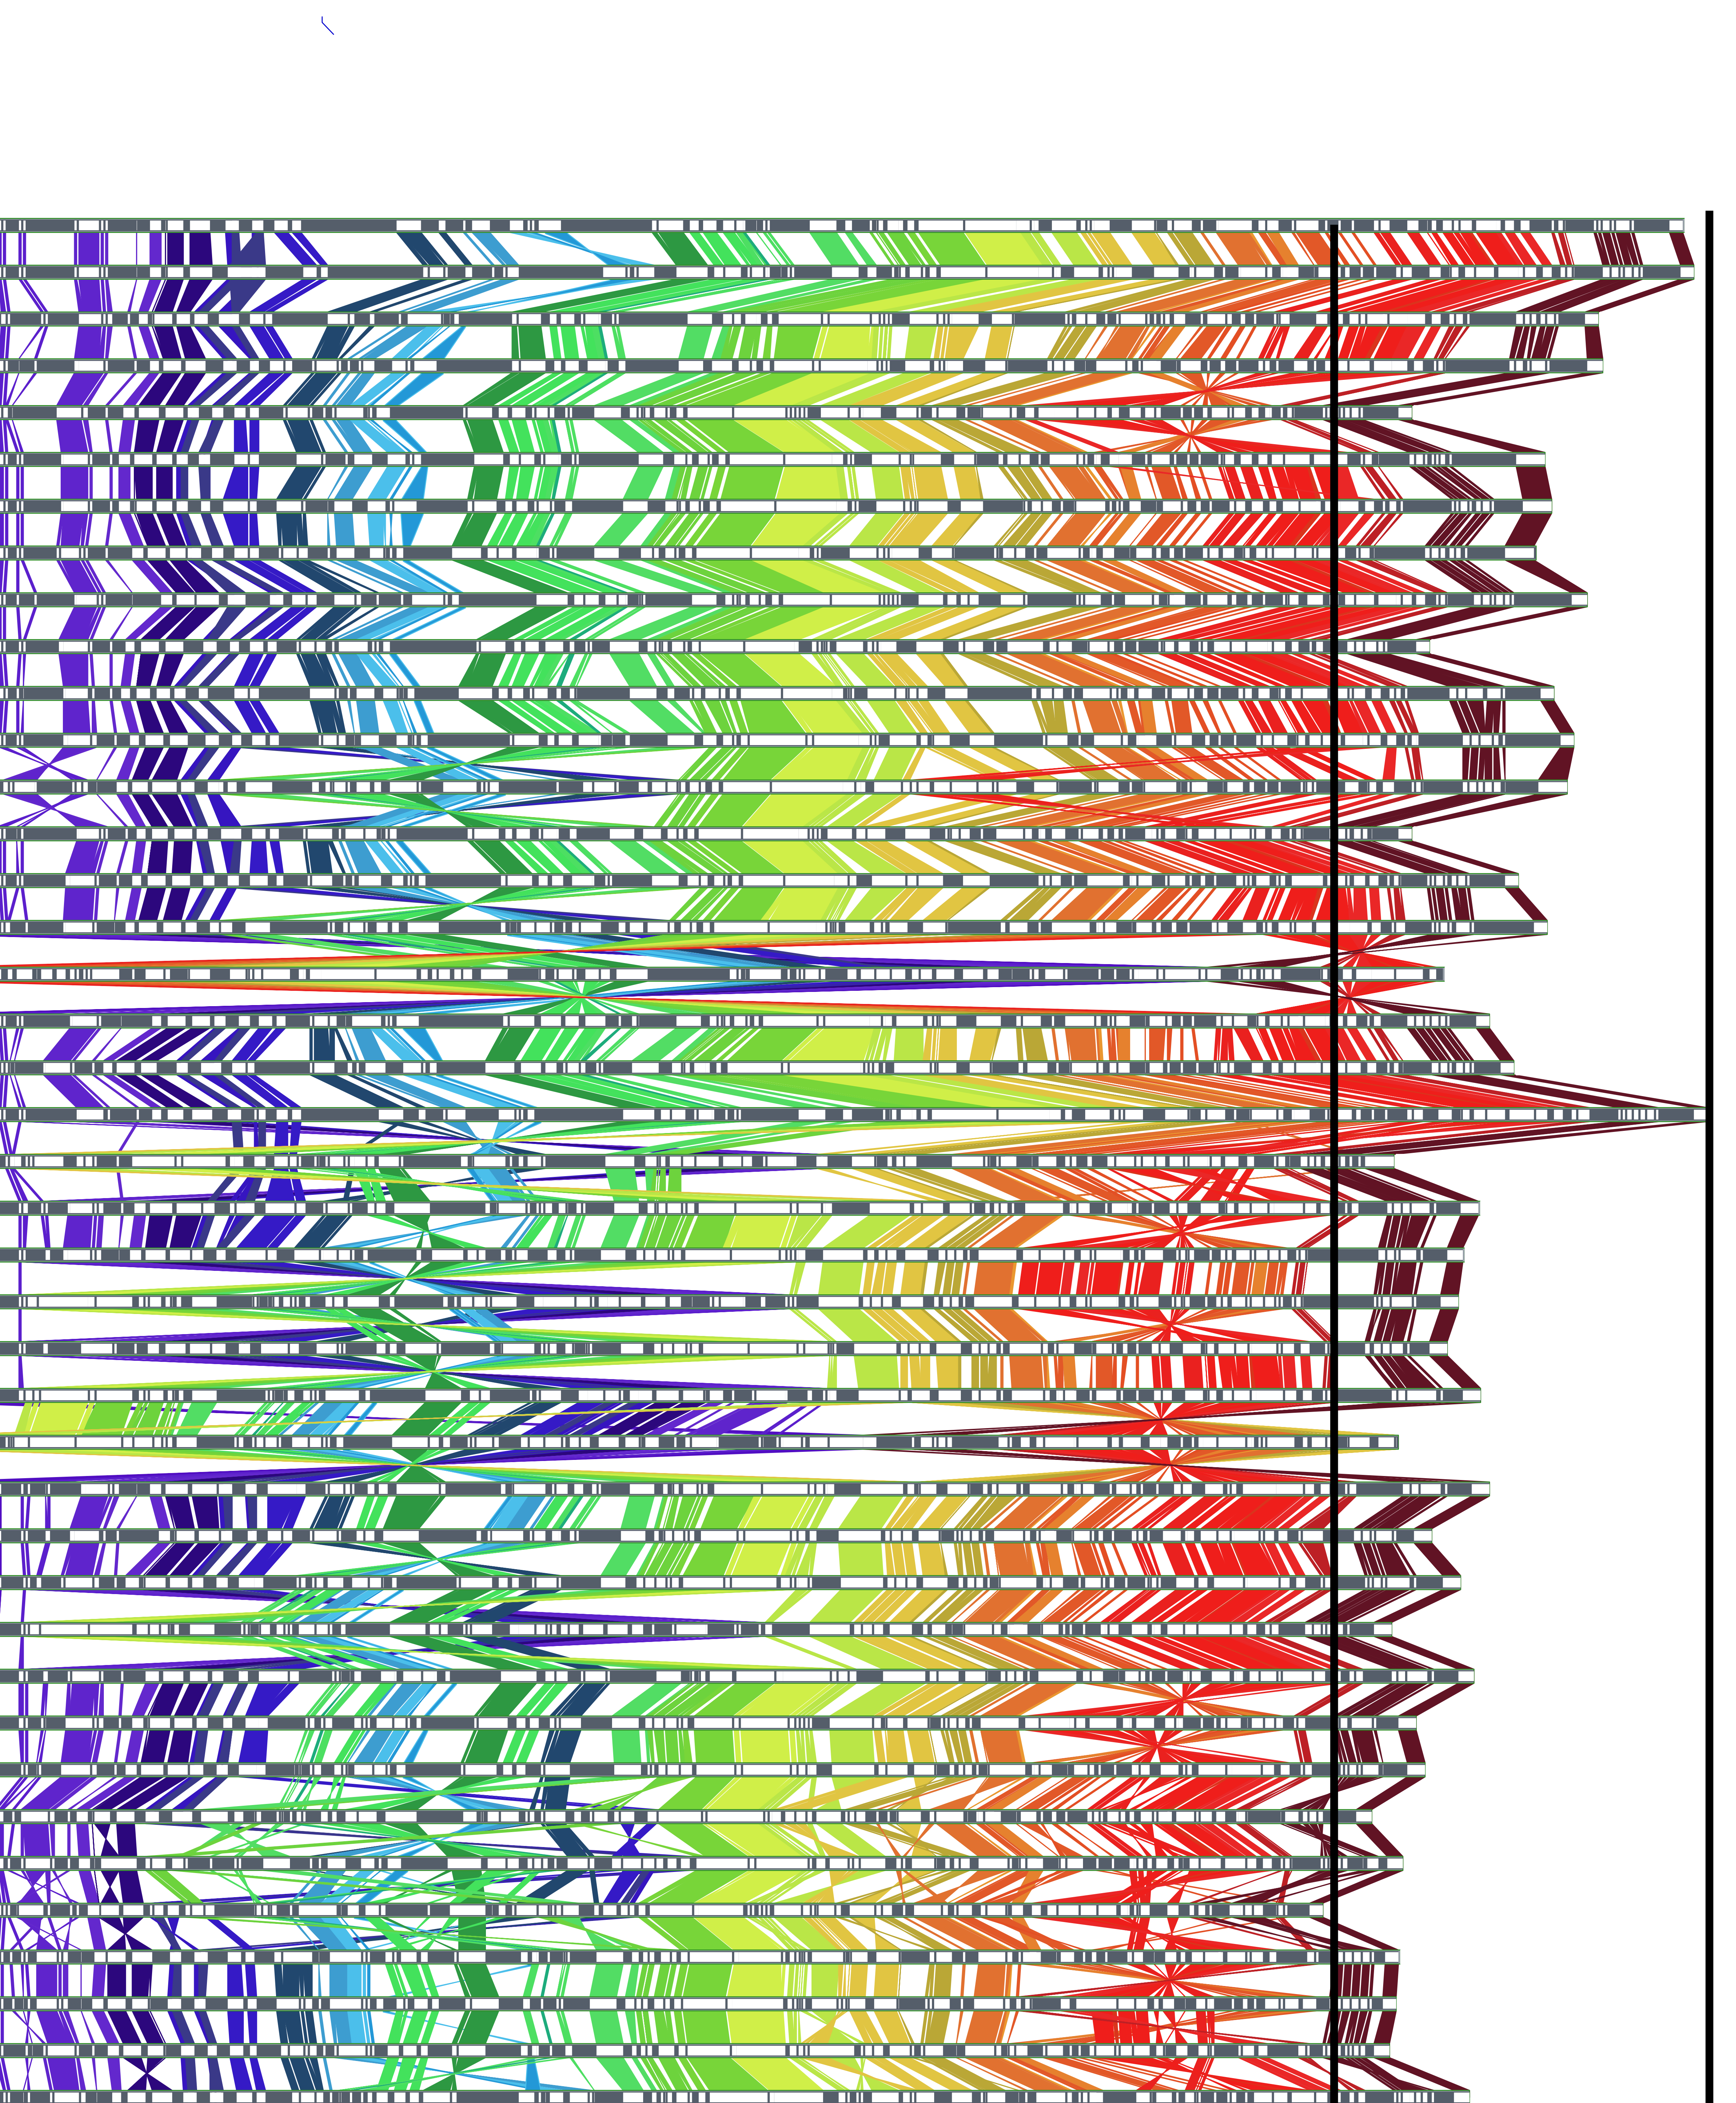

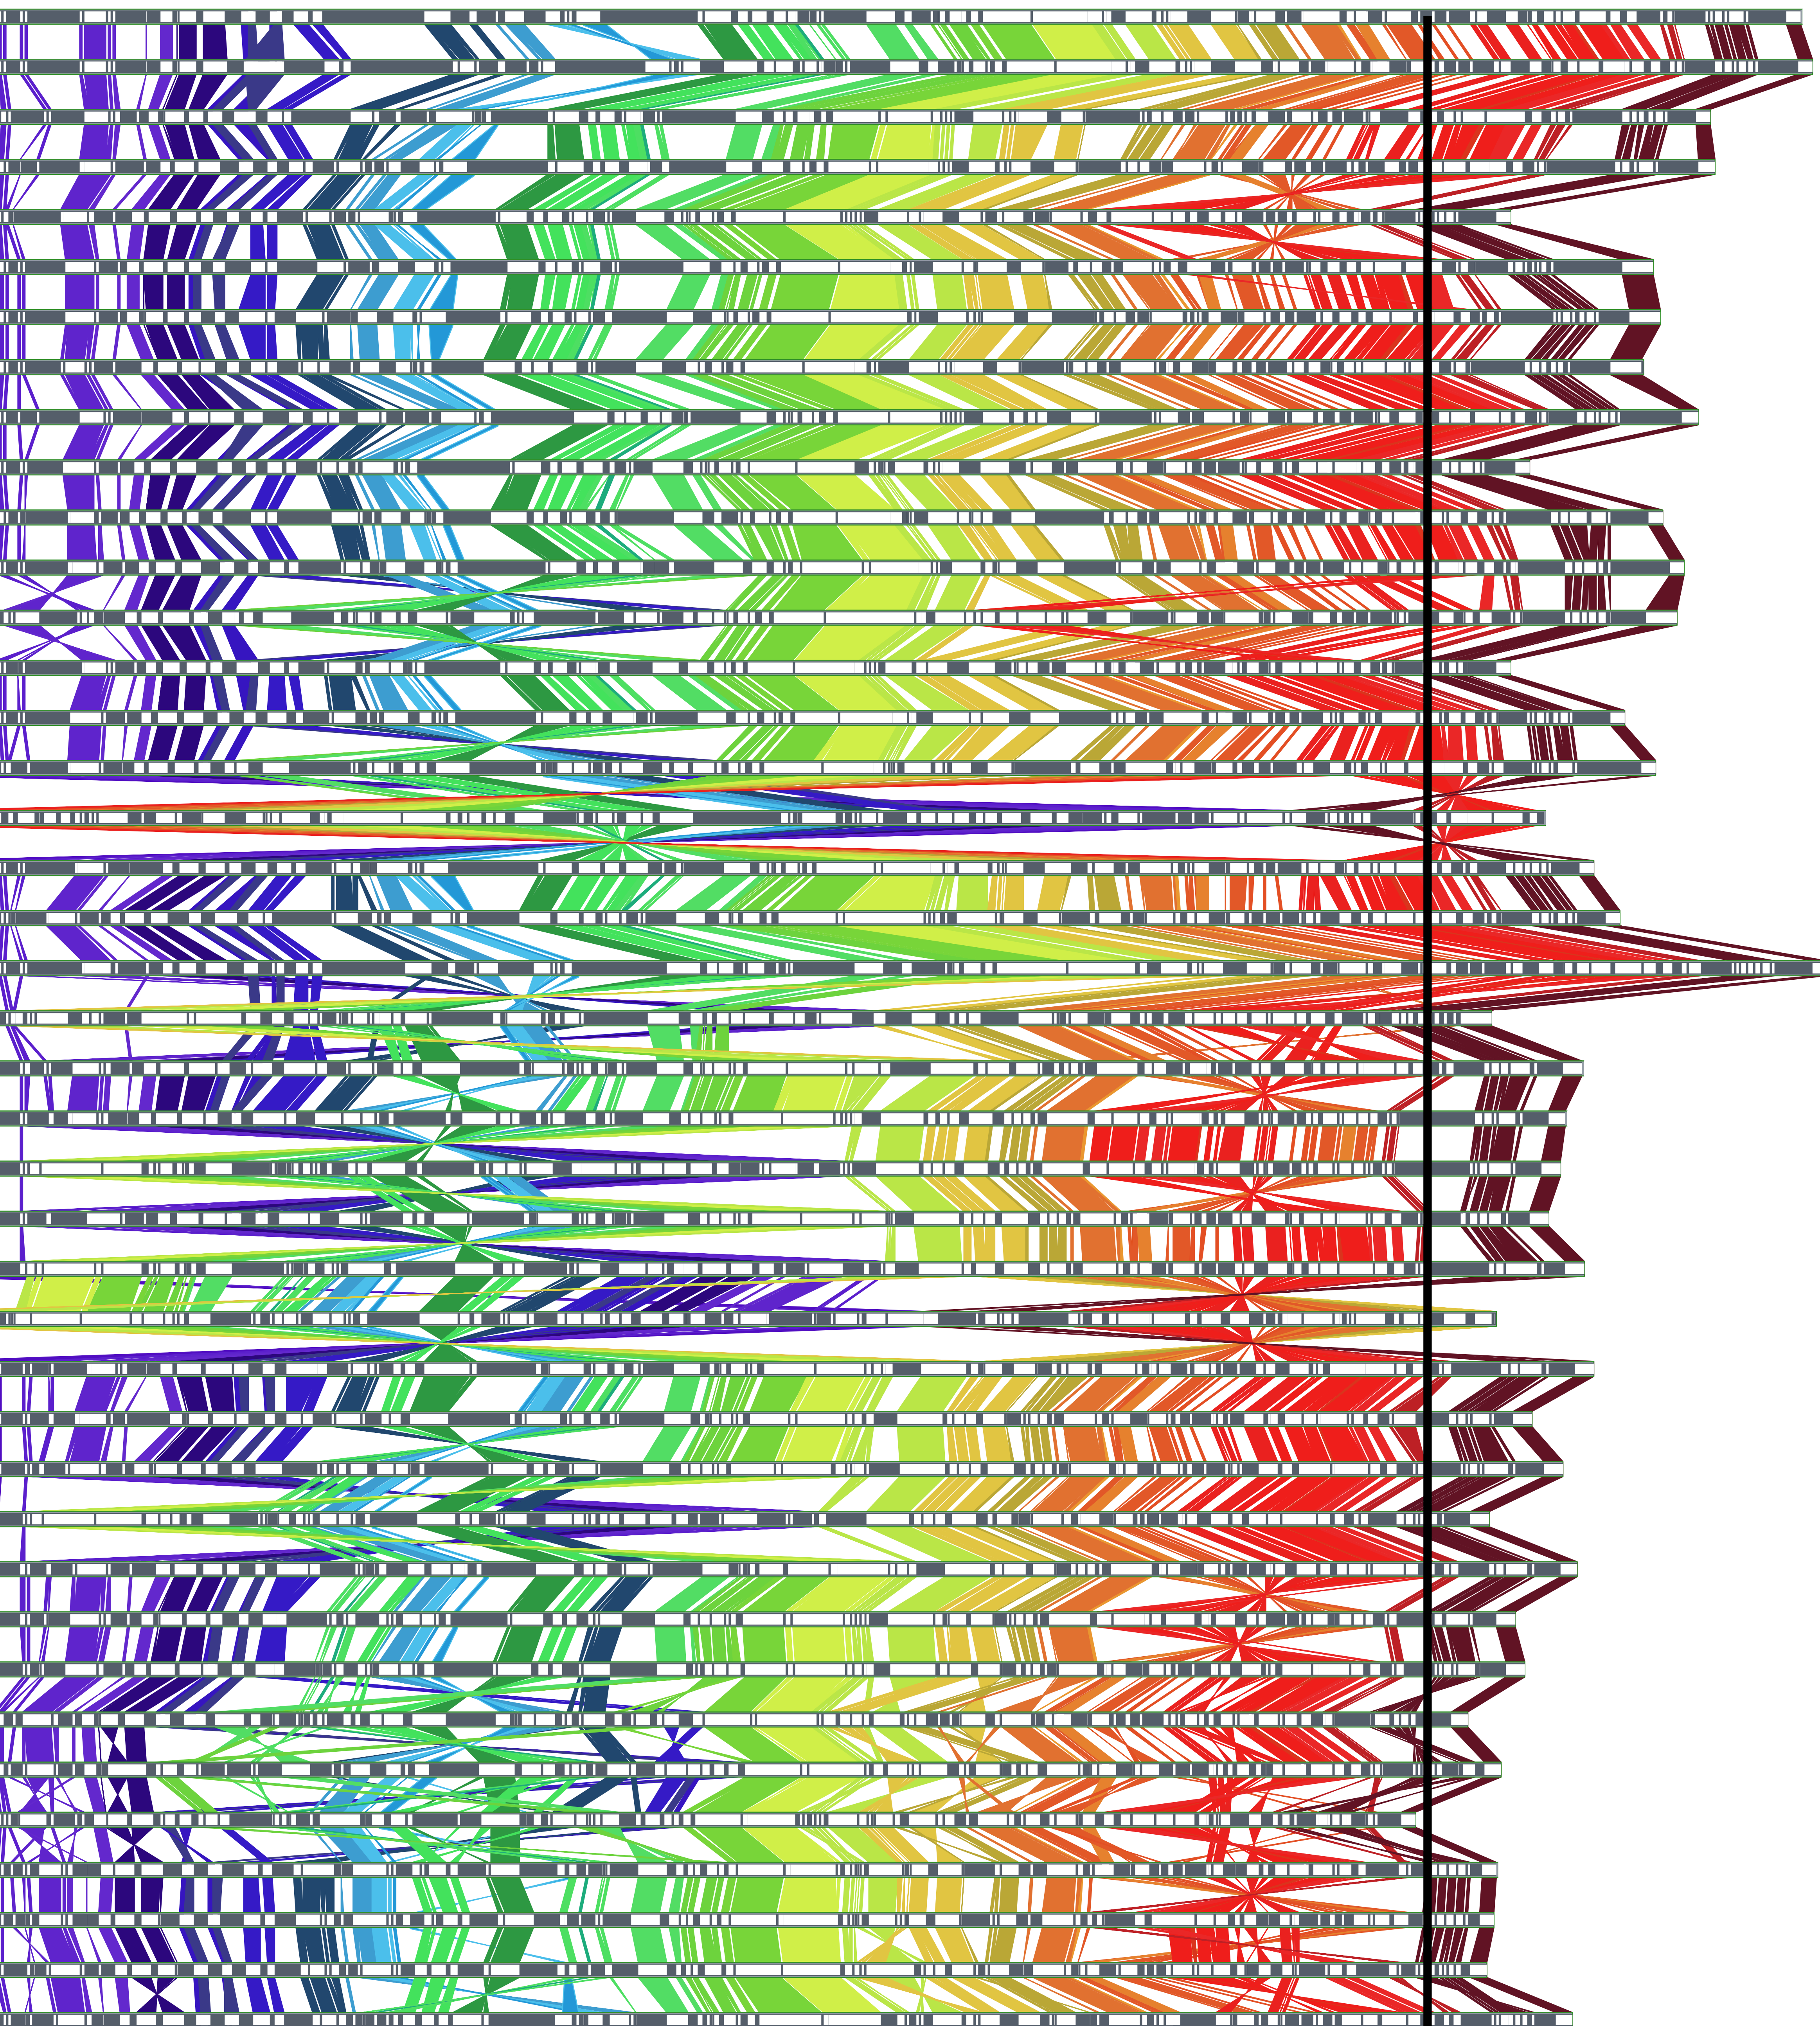





1

Supplement: pgen.1001284.s001.pdf [file pgen.1001284.s001.pdf]

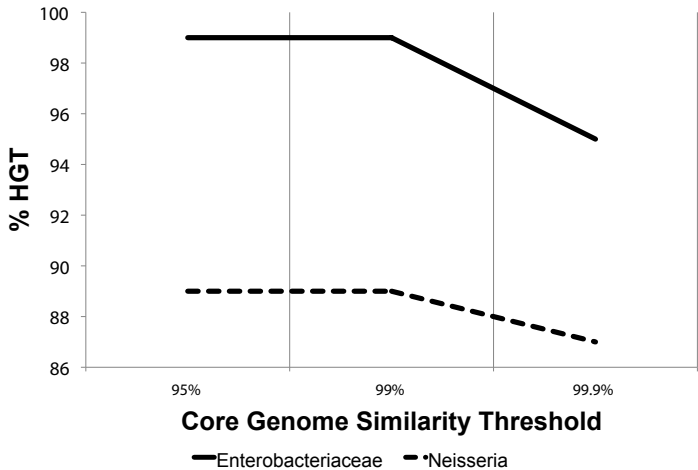

Supplement: pgen.1001284.s004.pdf [file pgen.1001284.s004.pdf]
